# Supplementary material
Source: HighWire-hosted journal article supplement (https://jnm.snmjournals.org/highwire/filestream/103483/field_highwire_adjunct_files/0/260646_Supplemental_Data.pdf)
Supplement: 260646_Supplemental_Data.pdf [file 260646_Supplemental_Data.pdf]

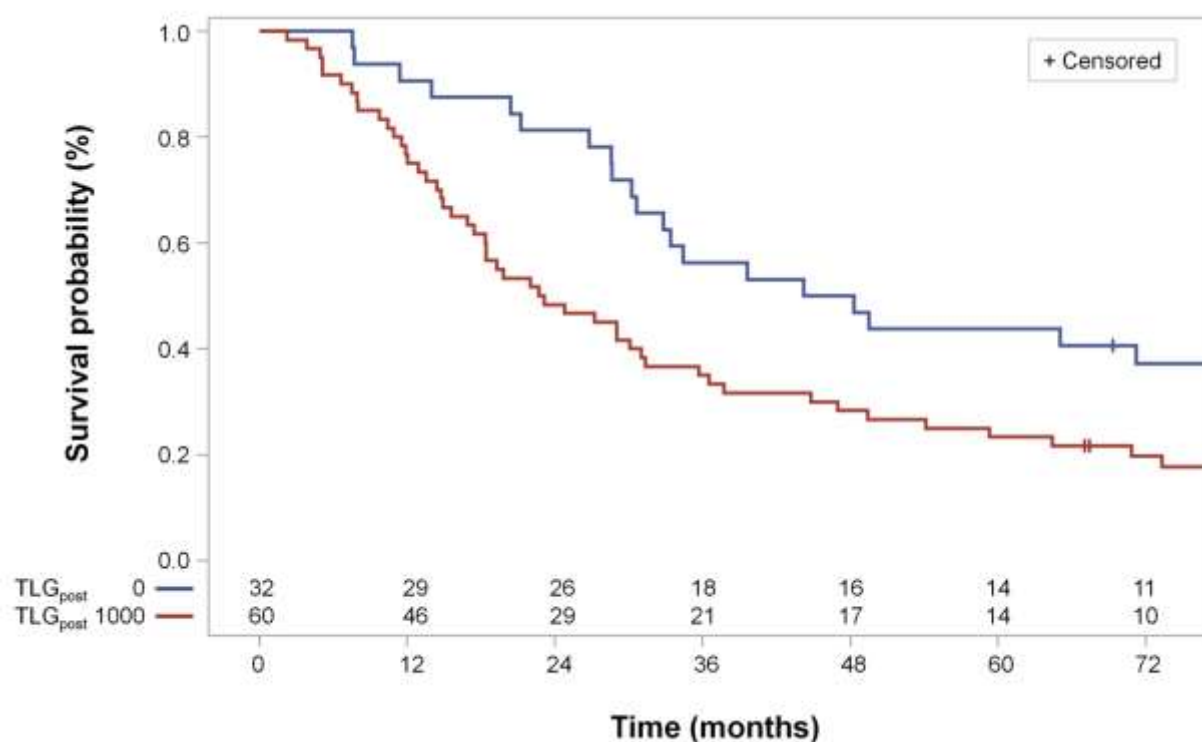

**SUPPLEMENTAL FIGURE 1A:** Exploration of Kaplan-Meier survival curves for the high-risk and low-risk groups of all eligible patients according to a  $TLG_{max(post)}$  at a cut-point of 11.3 by Youden's criterion from the time dependent ROC-curves at 60 months ( $p = 0.014$ , log-rank test).

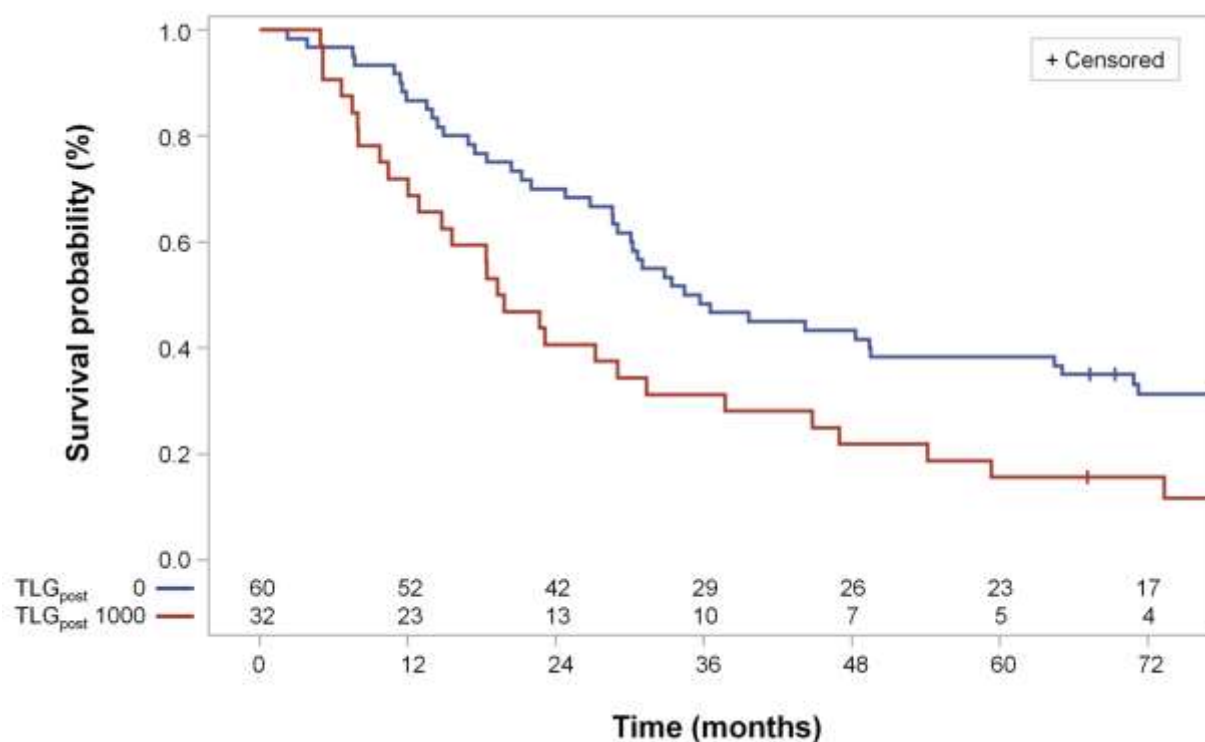

**SUPPLEMENTAL FIGURE 1B:** Kaplan-Meier survival curves for the high-risk and low-risk groups of all eligible patients according to a  $TLG_{\max(post)}$  cut-point of 75 separating into groups with reversed sizes compared to Supplement Fig1a ( $p = 0.008$ , log-rank test).
